# Supplementary material for: Sexing of chicken eggs by fluorescence and Raman spectroscopy through the shell membrane
Source: PubMed Central journal article supplement (PMC5824995; doi:10.1371/journal.pone.0192554), 2018-02-23
Supplement: pone.0192554.s001.pdf [file pone.0192554.s001.pdf]

## **Sexing of chicken eggs by fluorescence and Raman spectroscopy through the shell membrane**

*Roberta Galli, Grit Preusse, Christian Schnabel, Thomas Bartels, Kerstin Cramer, Maria-Elisabeth Krautwald-Junghanns, Edmund Koch, Gerald Steiner*

---

**S1 Table:** Fluorescence intensity of female eggs (n = 91) and of male eggs (n = 68), used to produce Fig 2B.

| Female    | Male      |
|-----------|-----------|
| 59465740  | 170213300 |
| 44659410  | 137423100 |
| 118887200 | 78493810  |
| 95654380  | 168850800 |
| 85316700  | 120435300 |
| 89867580  | 149403300 |
| 53714480  | 152990900 |
| 60386700  | 154619100 |
| 105383000 | 165146800 |
| 111704000 | 124499700 |
| 103018900 | 65906750  |
| 63105720  | 96026340  |
| 99364510  | 176001900 |
| 86546120  | 103286000 |
| 75963280  | 121070700 |
| 72534610  | 95718460  |
| 106569600 | 160533900 |
| 96022490  | 182550000 |
| 156644300 | 106273000 |
| 65999200  | 101333500 |
| 124742100 | 155613000 |
| 67684890  | 67139420  |
| 67043550  | 93872300  |
| 81247970  | 138203700 |
| 137515300 | 184952800 |
| 69263780  | 91947230  |
| 63344750  | 82798700  |
| 110782600 | 303658700 |
| 79611540  | 90834750  |
| 87956700  | 130907700 |
| 85247670  | 158917800 |
| 74216660  | 138995000 |
| 119022800 | 79439380  |
| 101318000 | 74977690  |
| 166579900 | 198008400 |
| 118829100 | 70805460  |
| 82446310  | 169149900 |
| 130630500 | 85404270  |

| Female    | Male      |
|-----------|-----------|
| 66702540  | 75408630  |
| 116944600 | 147241700 |
| 103098200 | 256487700 |
| 103207000 | 190257800 |
| 75193700  | 139052500 |
| 83311850  | 120895900 |
| 118414300 | 434952400 |
| 99480190  | 229123300 |
| 177281300 | 228025400 |
| 120718700 | 193036700 |
| 108607500 | 170047800 |
| 144788200 | 216172300 |
| 84603180  | 247789700 |
| 62306210  | 178690000 |
| 117904200 | 179304200 |
| 115285500 | 226756900 |
| 75809780  | 239383100 |
| 144394500 | 240129900 |
| 87722790  | 118847400 |
| 157699200 | 106957400 |
| 79510880  | 158160800 |
| 148701600 | 91716980  |
| 111938900 | 90161660  |
| 94304020  | 133594100 |
| 147216900 | 176853900 |
| 189883000 | 122375200 |
| 93265470  | 108675000 |
| 126086000 | 160277100 |
| 85233880  | 251078200 |
| 71922740  | 237614000 |
| 128033100 |           |
| 168025600 |           |
| 105617700 |           |
| 86032290  |           |
| 132884600 |           |
| 67488900  |           |
| 106298800 |           |
| 101201200 |           |

| Female    | Male |
|-----------|------|
| 69201760  |      |
| 120103400 |      |
| 80775190  |      |
| 104779400 |      |
| 110506900 |      |
| 150772500 |      |
| 82238100  |      |
| 116095800 |      |
| 98197380  |      |
| 63262100  |      |
| 142743100 |      |
| 58442340  |      |
| 108709700 |      |
| 110426500 |      |
| 71926060  |      |
