# Supplementary material for: Sexing of chicken eggs by fluorescence and Raman spectroscopy through the shell membrane
Source: PubMed Central journal article supplement (PMC5824995; doi:10.1371/journal.pone.0192554), 2018-02-23
Supplement: pone.0192554.s002.pdf [file pone.0192554.s002.pdf]

**Sexing of chicken eggs by fluorescence and Raman spectroscopy through the shell membrane**

*Roberta Galli, Grit Preusse, Christian Schnabel, Thomas Bartels, Kerstin Cramer, Maria-Elisabeth Krautwald-Junghanns, Edmund Koch, Gerald Steiner*

**S2 Table:** Scores of principal component analysis (female eggs n = 91, male eggs n = 68), used to produce Figs 4B and 4C.

| FEMALE     |             |             |             |             |             |             |
|------------|-------------|-------------|-------------|-------------|-------------|-------------|
| PC#1       | PC#2        | PC#3        | PC#4        | PC#5        | PC#6        | PC#7        |
| 0.039998   | -0.03342375 | 0.05429354  | -0.04993797 | 0.1173505   | 0.00379161  | 0.189611    |
| 0.03023673 | -0.03383821 | 0.0479674   | -0.06572527 | 0.08796153  | 0.08293096  | 0.05374194  |
| 0.07505866 | -0.04145262 | 0.05301946  | 0.03724666  | 0.1328884   | 0.1236001   | -0.1087836  |
| 0.04202347 | 0.03036664  | 0.1694113   | 0.07136149  | 0.2044175   | -0.04616725 | -0.08231712 |
| 0.05423988 | -0.04007672 | 0.02669309  | -0.04538325 | 0.1010646   | 0.08856021  | -0.05602665 |
| 0.04997856 | 0.04612415  | 0.05230108  | -0.02359084 | -0.3509687  | 0.2386086   | -0.1353566  |
| 0.03571101 | -0.02932984 | 0.0833483   | -0.00290222 | 0.05492726  | 0.04436014  | 0.08374703  |
| 0.03795726 | -0.0195509  | 0.04039111  | -0.03095433 | 0.01267002  | 0.04689846  | 0.0987814   |
| 0.05057935 | 0.0353656   | 0.06005153  | 0.03117827  | 0.02990309  | -0.01979186 | -0.05392768 |
| 0.07245508 | -0.05035544 | -0.01167689 | -0.06674655 | 0.03699273  | 0.1173178   | -0.05808302 |
| 0.06650005 | -0.04651166 | 0.05272357  | -0.08542729 | 0.06492173  | 0.0350484   | -0.08716863 |
| 0.04350348 | -0.03425311 | 0.1085761   | -0.01376377 | -0.03152838 | -0.01084209 | -0.00824744 |
| 0.03428776 | 0.05038149  | 0.05818152  | -0.06550259 | -0.01832683 | 0.0349654   | -0.05889725 |
| 0.05236962 | -0.01570484 | 0.05757273  | -0.05567165 | -0.1007892  | 0.00564997  | 0.09448263  |
| 0.05148713 | -0.03837736 | 0.1084674   | 0.05440446  | 0.05108324  | 0.03990537  | -0.06240959 |
| 0.04240297 | -0.02149607 | 0.09158091  | 0.00739776  | 0.07105593  | 0.03589754  | -0.0384216  |
| 0.05565573 | -0.01126678 | 0.00263815  | -0.01179619 | 0.0700015   | 0.1211052   | 0.04043057  |
| 0.05334679 | 0.00449892  | 0.03360611  | -0.02503716 | -0.08890167 | 0.04687369  | -0.06154155 |
| 0.09216767 | -0.02294659 | -0.02114091 | 0.09377745  | 0.03552388  | 0.1240046   | 0.1996016   |
| 0.04456947 | -0.03472999 | 0.09346288  | 0.01699409  | 0.0259035   | 0.04051316  | 0.04417278  |
| 0.07046613 | -0.00719563 | 0.03309239  | 0.04236834  | 0.03129327  | 0.02339217  | 0.0213992   |
| 0.04604933 | -0.04674553 | 0.1614336   | 0.03284572  | 0.1523726   | 0.00333804  | -0.09185059 |
| 0.0399769  | -0.03065287 | 0.05576394  | -0.08127473 | -0.00905612 | 0.04207151  | 0.0752439   |
| 0.04636955 | -0.01812564 | -0.01122741 | -0.1023648  | 0.01610911  | 0.01685224  | -0.00184836 |
| 0.08223316 | -0.03647838 | -0.01316384 | 0.0218586   | 0.03416166  | 0.07285002  | 0.05129099  |
| 0.04085669 | -0.02835854 | 0.0164281   | -0.09544767 | -0.01265314 | 0.07031172  | 0.03838567  |
| 0.04479096 | -0.03155501 | 0.07559485  | -0.0133176  | -0.08555722 | -0.02171179 | 0.08978136  |
| 0.07388086 | -0.03030824 | 0.1227401   | 0.123726    | -0.0439691  | -0.02419286 | -0.081644   |
| 0.04314033 | -0.00743032 | 0.03665175  | -0.04667463 | -0.02992078 | 0.06583299  | 0.04734675  |
| 0.04729903 | 0.00303375  | 0.08584443  | -0.02076882 | -0.05617735 | -0.02560542 | -0.02460709 |
| 0.05626596 | -0.04137359 | 0.1232907   | 0.04804921  | 0.01914056  | 0.01549815  | -0.01236743 |
| 0.04581929 | -0.01829673 | 0.07552465  | 0.01132353  | -0.08112697 | 0.0242315   | 0.07543023  |
| 0.07693418 | -0.03810001 | 0.05585644  | -0.01667295 | -0.00290574 | 0.01978459  | 0.00270459  |
| 0.06778496 | -0.0529     | 0.04845666  | -0.04567295 | 0.0020975   | 0.05682761  | -0.07371379 |
| 0.1025973  | -0.04907801 | 0.00166437  | 0.04697407  | 0.08411908  | 0.1485426   | -0.06390268 |

|            |             |             |             |             |             |             |
|------------|-------------|-------------|-------------|-------------|-------------|-------------|
| 0.06726384 | -0.00932195 | 0.06383127  | -0.03595135 | -0.02243624 | 0.05248906  | -0.1092064  |
| 0.05448051 | -0.03792736 | 0.1244627   | -0.04592538 | -0.03489828 | -0.02103335 | 0.04142047  |
| 0.07542444 | -0.00111907 | 0.1631434   | 0.1648646   | -0.03798982 | -0.04926275 | 0.1017453   |
| 0.0415432  | -0.03326083 | 0.08124453  | -0.02773575 | 0.02490416  | 0.02199061  | -0.0286205  |
| 0.0709052  | -0.0338405  | 0.01594236  | -0.02382242 | 0.03565115  | 0.04786957  | -0.0623121  |
| 0.07117614 | -0.05794146 | 0.08043002  | 0.02126416  | 0.0279034   | 0.03211077  | -0.1163887  |
| 0.06361352 | -0.02136544 | 0.03360401  | 0.04932851  | -0.06820183 | 0.06006607  | 0.04114309  |
| 0.04287503 | -0.02284541 | 0.01314508  | -0.08389752 | -0.00350543 | 0.06029913  | 0.01920969  |
| 0.04557557 | -0.02276177 | 0.00225536  | -0.04763384 | 0.04434826  | 0.0914081   | 0.07054801  |
| 0.07406206 | -0.02765474 | 0.00820525  | 0.03338312  | -0.06255632 | 0.03181453  | 0.03832171  |
| 0.0626667  | -0.03216063 | 0.0949628   | -0.00268976 | -0.0175506  | 0.01361905  | 0.06766099  |
| 0.1034379  | -0.01476367 | -0.08512393 | 0.03071059  | 0.03009583  | 0.07806197  | -0.02854012 |
| 0.07877814 | -0.02376232 | 0.05413022  | -0.00967692 | -0.1341181  | 0.04295342  | -0.128639   |
| 0.05737828 | 0.00554727  | 0.09111609  | 0.00479904  | -0.04199518 | -0.00182655 | 0.0499839   |
| 0.08914255 | -0.02130993 | -0.02028758 | -0.04269204 | -0.04475302 | 0.0566984   | -0.09213305 |
| 0.04721271 | -0.00158876 | 0.02100482  | -0.02948539 | -0.1179353  | 0.02030132  | -0.00593608 |
| 0.03779797 | -0.02737891 | 0.02484796  | -0.09675947 | -0.0111245  | 0.03071787  | 0.00721691  |
| 0.07351199 | -0.02670568 | 0.02481415  | -0.01464545 | 0.09824479  | -0.05548673 | -0.01721152 |
| 0.07206899 | -0.02600828 | 0.00830742  | -0.03056691 | -0.05112575 | 0.04737268  | -0.00900591 |
| 0.05358257 | -0.04223654 | 0.08484603  | -0.001294   | -0.00101375 | 0.01558485  | 0.06781496  |
| 0.08304498 | -0.03879496 | 0.00933537  | -0.03223018 | 0.1252339   | 0.03076476  | 0.06885148  |
| 0.05715833 | -0.06152023 | 0.02503232  | -0.0733811  | -0.01818371 | 0.04755087  | 0.2930166   |
| 0.09681927 | -0.05201612 | 0.03684699  | 0.06166172  | 0.07610444  | 0.1188874   | -0.01652706 |
| 0.04998377 | -0.05165116 | 0.00571731  | -0.1333077  | 0.06988242  | 0.03892955  | -0.03926391 |
| 0.09367355 | -0.04207169 | 0.01835625  | 0.02681642  | 0.03497598  | 0.04854506  | -0.04904267 |
| 0.06987132 | -0.01798737 | -0.01603412 | -0.03721779 | -0.08182376 | -0.06209322 | 0.06135299  |
| 0.06183079 | -0.05782092 | 0.0058482   | -0.09255561 | -0.01690287 | 0.08265191  | -0.00467848 |
| 0.0882271  | -0.02759454 | -0.01350899 | -0.0008695  | -0.02241549 | 0.02807355  | 0.02072682  |
| 0.1169973  | -0.04172101 | -0.07167827 | 0.06427167  | 0.09651341  | 0.0899638   | 0.02301401  |
| 0.05917099 | -0.07242732 | -0.01787278 | -0.1133635  | 0.1015081   | -0.00928224 | 0.07613411  |
| 0.07876661 | -0.03261179 | 0.03131624  | 0.03671709  | -0.02879972 | 0.0801509   | -0.02346493 |
| 0.05139347 | -0.0535112  | 0.00328814  | -0.126439   | 0.03823071  | 0.06590542  | 0.02106697  |
| 0.04677151 | -0.03923531 | 0.08020684  | 0.03332239  | 0.00464551  | 0.01885399  | 0.08559078  |
| 0.08210402 | -0.04559799 | 0.01311823  | 0.03988344  | 0.01693773  | 0.0489285   | 0.00459785  |
| 0.1057986  | -0.03423186 | -0.02568261 | 0.0945266   | -0.02569396 | 0.04393408  | 0.1458647   |
| 0.0648916  | -0.06183337 | 0.00649001  | -0.06506654 | 0.02070112  | 0.00317688  | 0.04743376  |
| 0.05945204 | -0.05129975 | 0.01546274  | -0.0203273  | -0.02889412 | 0.00696876  | 0.03367272  |
| 0.08126886 | -0.05242971 | -0.01565428 | -0.05976477 | -0.00326321 | 0.04671578  | 0.03195003  |
| 0.04200975 | -0.03546599 | 0.04801425  | -0.06833676 | -0.00842692 | -0.00040401 | 0.03133021  |
| 0.06299705 | -0.05319891 | 0.05134622  | -0.01819798 | 0.09912033  | 0.01879201  | -0.03421134 |
| 0.06590791 | -0.05452167 | 0.1233899   | -0.0108896  | 0.01342351  | 0.0264002   | -0.1418076  |
| 0.04312974 | -0.02680507 | 0.1113435   | 0.00391316  | 0.00771025  | -0.00552246 | -0.06226006 |
| 0.06334181 | 0.01150501  | 0.04748954  | 0.01167739  | -0.05509232 | 0.01332658  | 0.01422223  |

|             |             |             |             |             |             |             |
|-------------|-------------|-------------|-------------|-------------|-------------|-------------|
| 0.04655324  | -0.02453414 | 0.01805066  | -0.05017363 | -0.011264   | 0.05575463  | 0.0054385   |
| 0.05715742  | -0.02239748 | -0.02649877 | -0.04049138 | -0.0050561  | 0.01986653  | 0.03594993  |
| 0.0630478   | -0.02259533 | 0.05017797  | -0.09994454 | -0.05459315 | 0.02024025  | -0.1034377  |
| 0.09225013  | -0.02322497 | 0.04495704  | 0.1952957   | 0.02545837  | 0.03710558  | 0.03429001  |
| 0.05664365  | -0.04248392 | 0.1191855   | 0.04956712  | -0.0356594  | -0.04732344 | 0.06887976  |
| 0.0705367   | -0.03657846 | 0.02580089  | -0.05944141 | -0.00206769 | 0.01753376  | -0.03899684 |
| 0.06144481  | -0.03808733 | 0.03605601  | 0.03287108  | 0.02423178  | -0.01441989 | -0.05717954 |
| 0.04931478  | -0.03568602 | 0.1228672   | 0.07129279  | -0.1031205  | -0.09649809 | -0.01083926 |
| 0.09902203  | -0.05087767 | -0.03050376 | 0.0729552   | -0.05213637 | -0.00935008 | -0.01521187 |
| 0.04088362  | -0.05492985 | 0.0782366   | -0.08195345 | 0.01853722  | -0.02014541 | -0.06531245 |
| 0.06441738  | -0.01903707 | 0.04494849  | -0.02271248 | -0.09071848 | -0.02394812 | 0.01687964  |
| 0.06932499  | -0.03711002 | 0.08591921  | -0.03873574 | -0.06431549 | -0.04803766 | 0.00549319  |
| 0.04653785  | -0.03651664 | 0.06627402  | -0.03474091 | -0.05431938 | -0.03947439 | 0.05553567  |
| <b>MALE</b> |             |             |             |             |             |             |
| <b>PC#1</b> | <b>PC#2</b> | <b>PC#3</b> | <b>PC#4</b> | <b>PC#5</b> | <b>PC#6</b> | <b>PC#7</b> |
| 0.07346832  | 0.07766338  | -0.03690509 | 0.00537521  | 0.179842    | -0.03487345 | 0.01669892  |
| 0.05903339  | 0.05325626  | 0.09440046  | 0.01698799  | 0.1894822   | -0.04705044 | -0.04955554 |
| 0.03630751  | 0.0208724   | 0.02016155  | -0.05900478 | 0.03120591  | 0.00272789  | 0.03119228  |
| 0.07359931  | 0.08144721  | 0.06005386  | 0.00092679  | 0.0625685   | -0.09506905 | 0.05705633  |
| 0.07109673  | -0.0158733  | 0.03176162  | -0.01891021 | 0.07416649  | -0.0996599  | -0.00151596 |
| 0.07393183  | 0.04021484  | 0.05872925  | -0.02266252 | 0.09586658  | -0.09820266 | -0.1308994  |
| 0.04649766  | 0.115438    | 0.1063944   | -0.04960067 | -0.02813383 | -0.07431281 | -0.05431617 |
| 0.09278401  | -0.02246359 | 0.03408069  | -0.07135038 | 0.06629911  | -0.06032663 | -0.05835101 |
| 0.0842887   | 0.0353947   | -0.02214658 | -0.07088169 | -0.03727351 | -0.09462439 | 0.08388905  |
| 0.06568602  | 0.02268611  | 0.09926853  | 0.09218023  | 0.00583005  | -0.04423497 | 0.09705626  |
| 0.0340136   | 0.00511638  | 0.04692358  | -0.08940334 | -0.02737242 | 0.01175781  | 0.0069329   |
| 0.05059748  | 0.00171625  | 0.09361126  | -0.01349612 | 0.03491341  | -0.02217379 | -0.01696628 |
| 0.05206346  | 0.1649036   | 0.04487531  | 0.00413861  | -0.1582397  | -0.02188946 | -0.04819117 |
| 0.05840709  | 0.00953091  | 0.1909735   | 0.1458115   | 0.04900286  | -0.06575875 | 0.1349953   |
| 0.07067718  | -0.0003141  | 0.00094205  | -0.00393923 | -0.04462774 | 0.01215768  | -0.04194604 |
| 0.05030333  | -0.00211171 | 0.0153904   | -0.09966791 | 0.05907311  | -0.04085391 | 0.1163519   |
| 0.0995184   | -0.02192089 | -0.02995689 | -0.04418687 | -0.0110847  | -0.0498465  | -0.07181635 |
| 0.09259985  | 0.04817661  | -0.02375658 | 0.08228768  | -0.04436462 | 0.01489207  | 0.1131529   |
| 0.0674073   | -0.02591981 | 0.1044341   | 0.1242632   | 0.02412357  | -0.0234505  | -0.0116469  |
| 0.05121142  | 0.01830134  | 0.07396338  | 0.01136211  | -0.03770083 | -0.06258962 | -0.00171659 |
| 0.06682125  | 0.0793948   | -0.00970338 | -0.02011839 | 0.00270277  | -0.07619762 | -0.04710947 |
| 0.04106454  | -0.02561143 | 0.07299137  | -0.0727448  | -0.03702273 | 0.00237392  | 0.08471396  |
| 0.05899328  | -0.02820604 | 0.1300951   | 0.04500138  | 0.06477365  | -0.0149733  | -0.1124049  |
| 0.04991369  | 0.08372589  | 0.0261433   | -0.06055768 | -0.03667925 | -0.04706798 | -0.01912499 |
| 0.09432766  | 0.04369193  | -0.05189345 | -0.133243   | -0.0792005  | -0.161186   | -0.02460263 |
| 0.04397737  | 0.00908597  | 0.00526874  | -0.0892578  | -0.02908353 | -0.02016512 | -0.0014358  |
| 0.04617335  | -0.00601417 | 0.0879263   | -0.02426658 | 0.02322957  | -0.0178715  | -0.08915284 |
| 0.1357827   | 0.1237477   | -0.06362899 | 0.203416    | 0.04997377  | 0.05047577  | -0.04296237 |

|              |             |             |             |             |             |             |
|--------------|-------------|-------------|-------------|-------------|-------------|-------------|
| 0.04512624   | -0.00457575 | 0.1099544   | -0.09131783 | 0.04533331  | -0.00256889 | -0.04207561 |
| 0.07235972   | 0.01312309  | 0.03049104  | -0.09986184 | -0.1328748  | -0.0936375  | 0.1178169   |
| 0.07446365   | 0.06067639  | 0.00979423  | -0.00154703 | -0.03060035 | -0.09416044 | -0.07674278 |
| 0.07395675   | 0.01970318  | -0.00730105 | 0.00541433  | -0.05742633 | -0.02820208 | -0.02802687 |
| 0.04355444   | -0.00358935 | 0.1470373   | 0.0074085   | 0.00653446  | -0.05320006 | 0.1280497   |
| 0.05010245   | -0.02062528 | 0.04523043  | 0.04519319  | -0.0646118  | -0.05696474 | 0.06132761  |
| 0.07151285   | 0.1313329   | -0.01982357 | -0.00116159 | -0.06573968 | -0.03760587 | 0.01184658  |
| 0.03321417   | 0.00905475  | 0.05248976  | -0.08400961 | -0.0348556  | 0.00335884  | 0.1103347   |
| 0.08187406   | 0.07937657  | 0.01556202  | -0.08034382 | -0.03760049 | -0.1521265  | -0.1054367  |
| 0.04572837   | -0.01029602 | 0.08456614  | -0.03451285 | -0.00037807 | -0.00157233 | 0.07442932  |
| 0.04244977   | -0.01114427 | 0.1013711   | 0.02141044  | 0.05465796  | -0.0073976  | -0.04542311 |
| 0.08257034   | 0.01837185  | -0.00277399 | 0.0115677   | -0.1013022  | -0.04989106 | 0.00020117  |
| 0.1320545    | 0.1227203   | -0.03741488 | 0.0724248   | -0.2549678  | -0.1009044  | -0.1455114  |
| 0.07192884   | 0.06692021  | -0.0788386  | -0.2186991  | 0.07086429  | -0.3032773  | 0.04985695  |
| 0.07724716   | 0.00724985  | 0.00051504  | 0.09642538  | 0.02004149  | -0.00951775 | 0.07140925  |
| 0.06664909   | -0.00237192 | 0.03785511  | -0.04613815 | -0.01573791 | -0.05758406 | -0.05457974 |
| -0.07673212* | 0.4932952   | 0.2346259*  | -0.1573403* | 0.1274392*  | 0.0437304   | 0.1239451*  |
| 0.1139911    | 0.06430333  | -0.09350127 | 0.07750636  | -0.02413425 | 0.02335889  | -0.04038006 |
| 0.1121488    | 0.07900671  | -0.05588329 | 0.1176254   | 0.01908632  | 0.00730581  | -0.07143132 |
| 0.1121972    | 0.03196979  | -0.03841349 | 0.1061123   | -0.03961632 | -0.0912457  | 0.01186282  |
| 0.08270756   | 0.03798485  | 0.00989461  | 0.00479584  | -0.03338294 | -0.02662204 | 0.03963051  |
| 0.1032549    | 0.07472014  | -0.09823155 | 0.03764557  | 0.06493215  | -0.01862974 | 0.00785521  |
| 0.08176844   | 0.178992    | -0.01688472 | 0.02589688  | 0.01289191  | -0.02486729 | -0.00518449 |
| 0.09770374   | 0.03349519  | -0.07046333 | -0.07547591 | -0.05261742 | -0.1377346  | 0.04877707  |
| 0.04937397   | 0.1475282   | 0.01530708  | -0.01420226 | -0.04993538 | -0.03418599 | 0.05240617  |
| 0.1416908    | -0.03579046 | -0.112185   | 0.04267792  | 0.04025769  | -0.01509912 | 0.00111333  |
| 0.08341931   | 0.1764771   | 0.02061465  | 0.1057242   | -0.0695756  | -0.06726508 | -0.1033163  |
| 0.1312936    | 0.03932471  | -0.1032221  | 0.2151524   | 0.00646112  | 0.01590471  | 0.06283113  |
| 0.06406943   | -0.02258458 | 0.05324708  | -0.01746807 | 0.05645326  | -0.05511122 | 0.03184828  |
| 0.05465787   | 0.00312818  | 0.07068024  | -0.02627587 | -0.1026178  | -0.06790934 | 0.00418823  |
| 0.08716922   | -0.01291218 | -0.00798896 | 0.01628433  | 0.0651567   | -0.01026193 | 0.00427106  |
| 0.04106171   | 0.01481891  | 0.03539839  | -0.05952333 | -0.03841298 | -0.0429772  | 0.07684065  |
| 0.05062107   | -0.01822304 | 0.1001425   | -0.00466972 | 0.01986667  | -0.05258013 | -0.05384792 |
| 0.06513016   | 0.02200885  | -0.01779963 | -0.00907942 | -0.04029067 | -0.05365205 | 0.06572208  |
| 0.06597462   | 0.09984177  | 0.05977351  | -0.01304444 | 0.01028294  | -0.1165957  | -0.06051505 |
| 0.06873673   | -0.02233615 | 0.1159738   | 0.05551024  | 0.11004     | -0.03722055 | -0.00910629 |
| 0.04383946   | 0.0443865   | 0.05440319  | -0.02317278 | -0.05013699 | -0.1237755  | -0.0254818  |
| 0.09088498   | 0.00361427  | -0.03463318 | -0.0007859  | 0.01122279  | -0.08753941 | -0.01365407 |
| 0.1404607    | -0.02082452 | -0.1136332  | -0.01349087 | 0.06603864  | -0.2177514  | 0.190835    |
| 0.09105778   | 0.120244    | -0.04658403 | -0.05245592 | 0.04241504  | -0.1006857  | 0.00685233  |
